# Supplementary material for: An effective strategy for the preparation of a wide-temperature-range proton exchange membrane based on polybenzimidazoles and polyacrylamide hydrogels
Source: Royal Society of Chemistry journal article supplement (doi:10.1039/d0ta08872b), 2021-01-01
Supplement: d0ta08872b1.pdf [file d0ta08872b1.pdf]

## Supporting information

Table S1. The membrane resistances at different temperatures.

| Item  | OPBI                | OPBI-0.5AM          | OPBI-0.8AM          | OPBI-1.0AM          | OPBI-2.0AM          |
|-------|---------------------|---------------------|---------------------|---------------------|---------------------|
| 40°C  | $1.179 \times 10^5$ | $2.715 \times 10^4$ | $1.070 \times 10^4$ | $7.638 \times 10^3$ | $3.307 \times 10^3$ |
| 60°C  | $7.656 \times 10^4$ | $2.159 \times 10^4$ | $7.054 \times 10^3$ | $5.147 \times 10^3$ | $2.573 \times 10^3$ |
| 80°C  | $4.110 \times 10^4$ | $1.326 \times 10^4$ | $4.576 \times 10^3$ | $3.709 \times 10^3$ | $1.662 \times 10^3$ |
| 100°C | $2.206 \times 10^4$ | $8.388 \times 10^3$ | $3.357 \times 10^3$ | $2.431 \times 10^3$ | $1.200 \times 10^3$ |
| 120°C | $2.102 \times 10^4$ | $5.615 \times 10^3$ | $2.428 \times 10^3$ | $1.780 \times 10^3$ | $1.066 \times 10^3$ |
| 140°C | $1.661 \times 10^4$ | $4.743 \times 10^3$ | $1.893 \times 10^3$ | $1.423 \times 10^3$ | $9.234 \times 10^2$ |
| 160°C | $1.503 \times 10^4$ | $4.558 \times 10^3$ | $1.602 \times 10^3$ | $1.163 \times 10^3$ | $8.352 \times 10^2$ |
| 180°C | $1.290 \times 10^4$ | $4.677 \times 10^3$ | $1.703 \times 10^3$ | $1.236 \times 10^3$ | $9.165 \times 10^2$ |

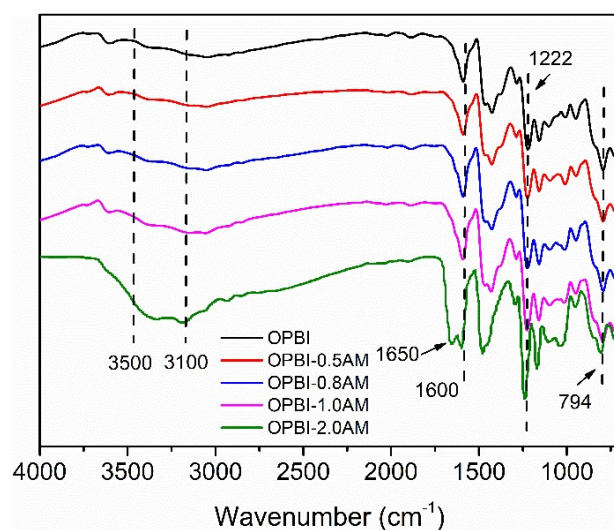

Fig. S1. FTIR spectra of the PBI-AM membrane.

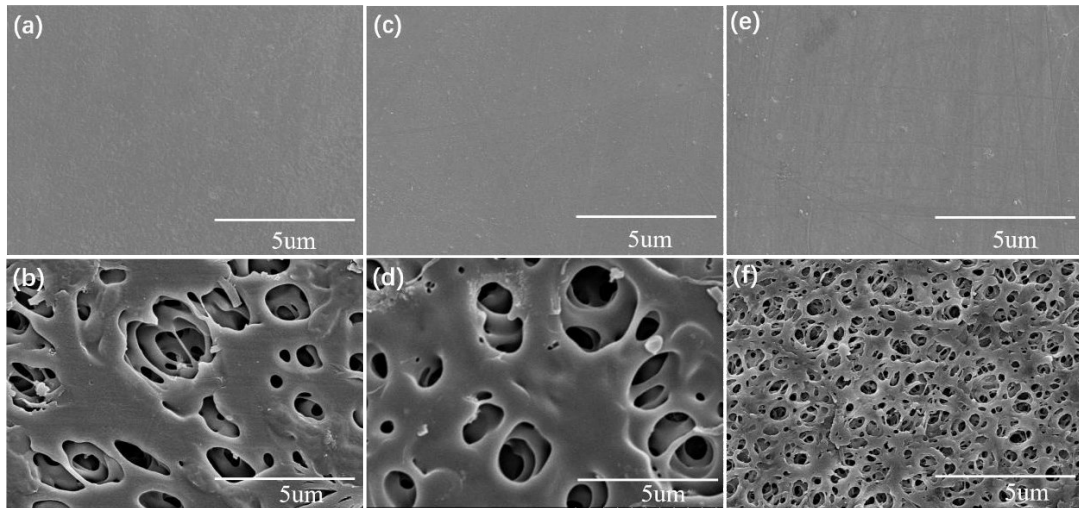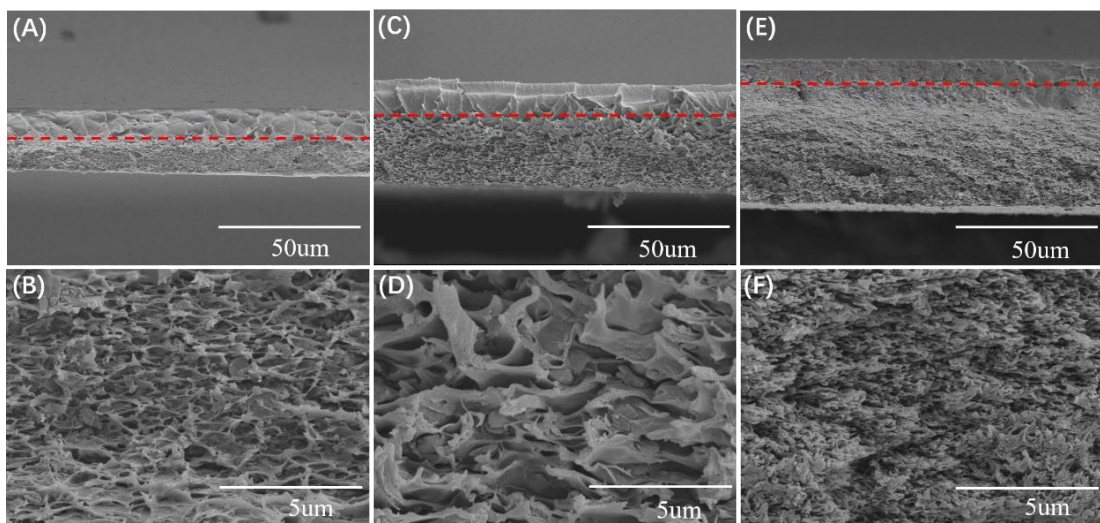

Fig. S2. SEM micrographs of OPBI-AM membranes. (a)(b) The surface of the OPBI-0.5AM membrane; (c)(d) OPBI-1.0AM membrane; and (e)(f) OPBI-2.0AM membrane; (A)(B) The cross-sections of the OPBI-0.5AM membrane; (C)(D) OPBI-1.0AM membrane; and (E)(F) OPBI-2.0AM membrane

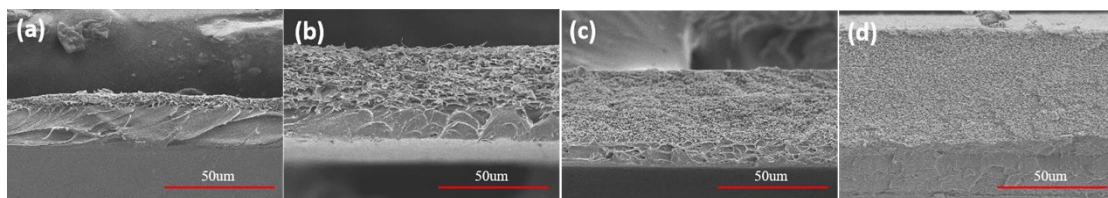

Fig. S3. The SEM micrographs of hydrated membranes using freeze drying (a) OPBI-0.5AM; (b) OPBI-0.8AM; (c) OPBI-1.0AM; (d) OPBI-2.0AM.

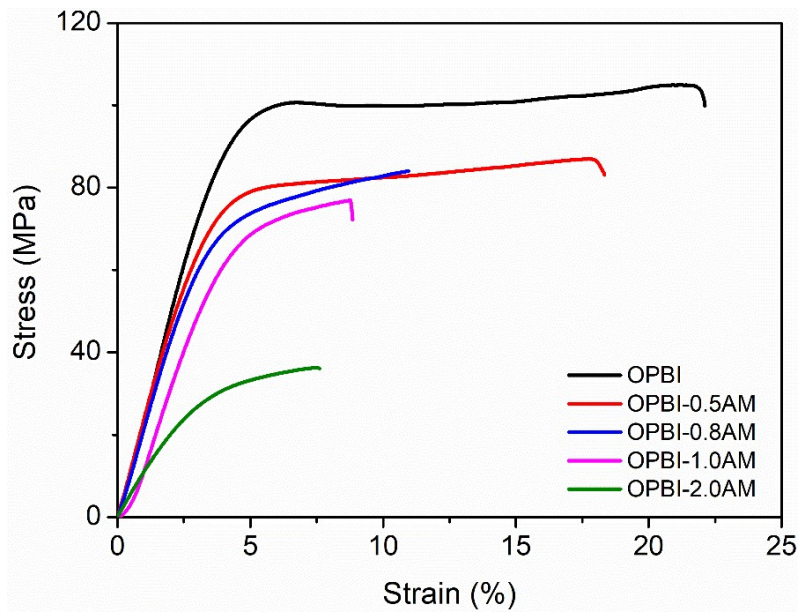

Fig. S4. Tensile stress and strain curves of the pure membranes.

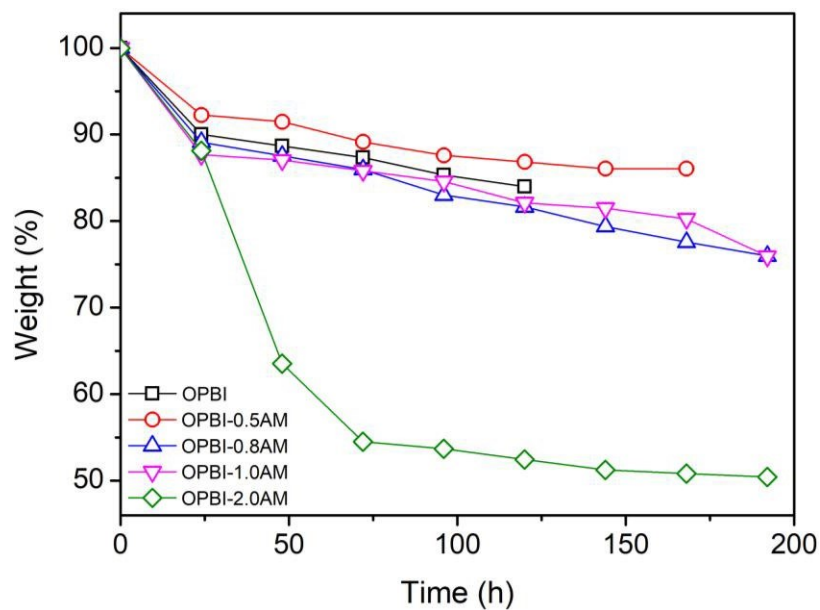

Fig. S5. Fenton test results of the membranes prepared in a 3 wt%  $\text{H}_2\text{O}_2$  solution containing 4 ppm  $\text{Fe}^{2+}$  at 80 °C

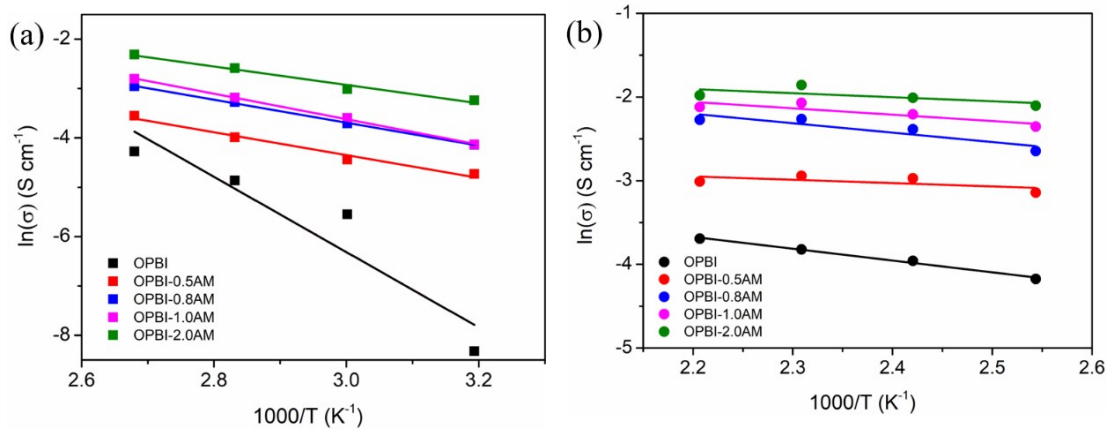

Fig. S6. The Arrhenius plot of OPBI, OPBI-0.5AM, OPBI-0.8AM, OPBI-1.0AM, OPBI-2.0AM (a) at temperature 40-100°C; (b) at temperature 120-180°C

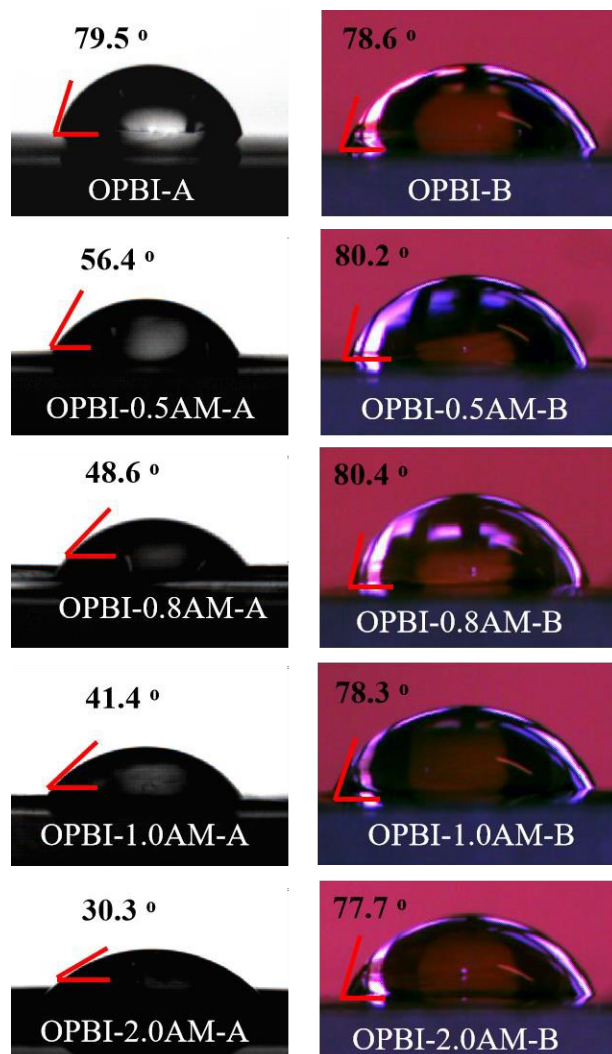

Fig. S7. Water contact angles of the membranes: A is the bottom of membrane (closed to PAM side) B is the top of membrane (closed to OPBI side)

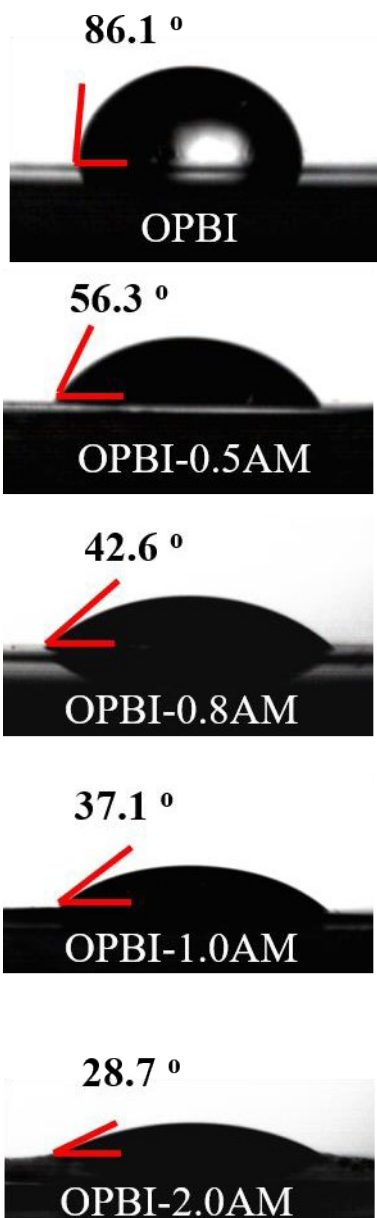

Fig. S8. Phosphoric acid contact angles of the membranes.

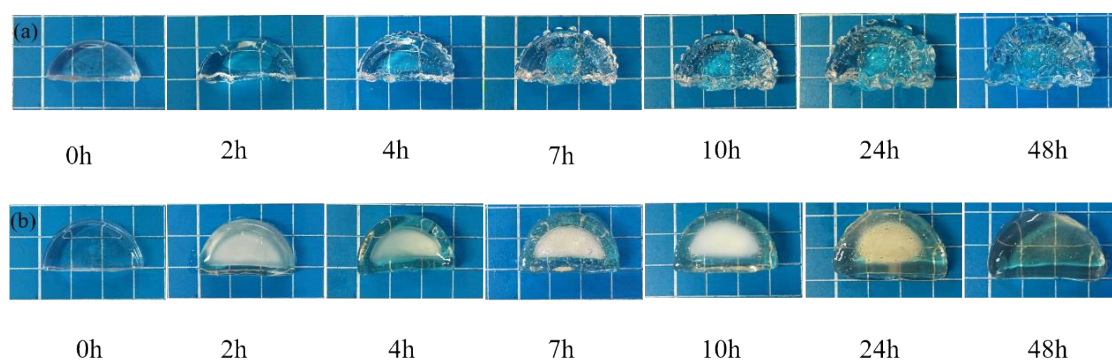

Fig. S9. The photos of polyacrylamide hydrogel in phosphoric acid solution: (a) 80 °C; (b) 160 °C
